# Supplementary material
Source: publisher figshare collection journal article supplement (https://frontiersin.figshare.com/ndownloader/files/24529241)
Supplement: Supplementary file [file 24529241]

**Supplementary Table 2.** Basal (indigenous) *Streptococcus dentisani* plaque levels for all participants in relation to toothbrushing frequency.

|                                         | Toothbrushing Frequency <sup>1</sup> | Mean                 | Standard Deviation   | p-value |
|-----------------------------------------|--------------------------------------|----------------------|----------------------|---------|
| <i>S. dentisani</i> levels <sup>2</sup> | 1                                    | 7.71x10 <sup>2</sup> | 1.07x10 <sup>3</sup> | 0.03    |
|                                         | 2                                    | 1.43x10 <sup>3</sup> | 1.83x10 <sup>3</sup> |         |
|                                         | 3                                    | 1.42x10 <sup>3</sup> | 5.23x10 <sup>3</sup> |         |
| <i>S. dentisani</i> % <sup>3</sup>      | 1                                    | 0.29                 | 0.35                 | 0.04    |
|                                         | 2                                    | 0.42                 | 0.43                 |         |
|                                         | 3                                    | 0.42                 | 1.28                 |         |

<sup>1</sup> Number of tooth brushings per day as reported by participants at baseline

<sup>2</sup> Number of CFUs was calculated by qPCR and normalized by ng of DNA, as determined by fluorescence

<sup>3</sup> Percentage of the organism was calculated by qPCR with *S. dentisani* specific primers over the total number of bacteria as estimated by qPCR with universal primers
